# Supplementary material
Source: PubMed Central journal article supplement (PMC9414277)
Supplement: ccr-21-2283_supp.pdf [file ccr-21-2283_supp.pdf]

## Supplemental Methods

- Treatment-free survival (TFS) and time on protocol therapy were partitioned into survival states with and without toxicity, as illustrated below
- We examined treatment-related adverse events (TRAEs) reported between randomization and start of subsequent therapy (including TRAEs newly reported after cessation of protocol therapy) and counted the number of unique days with one or more TRAEs reported during the relevant period
  - If a TRAE started during protocol therapy and persisted after cessation, then the days were split and attributed to the relevant period
  - If a TRAE was unresolved at subsequent therapy initiation, then the days were truncated at that point
- Without double-counting TRAEs occurring on the same day, we summed the unique days during each period; these were represented as contiguous days, although they did not occur that way (1,2)
- Two additional endpoints were calculated for partitioning and illustration—time to cessation of both protocol therapy and its toxicity, and time to cessation of protocol therapy without toxicity—by adding and subtracting toxicity days from the time to protocol therapy cessation endpoint

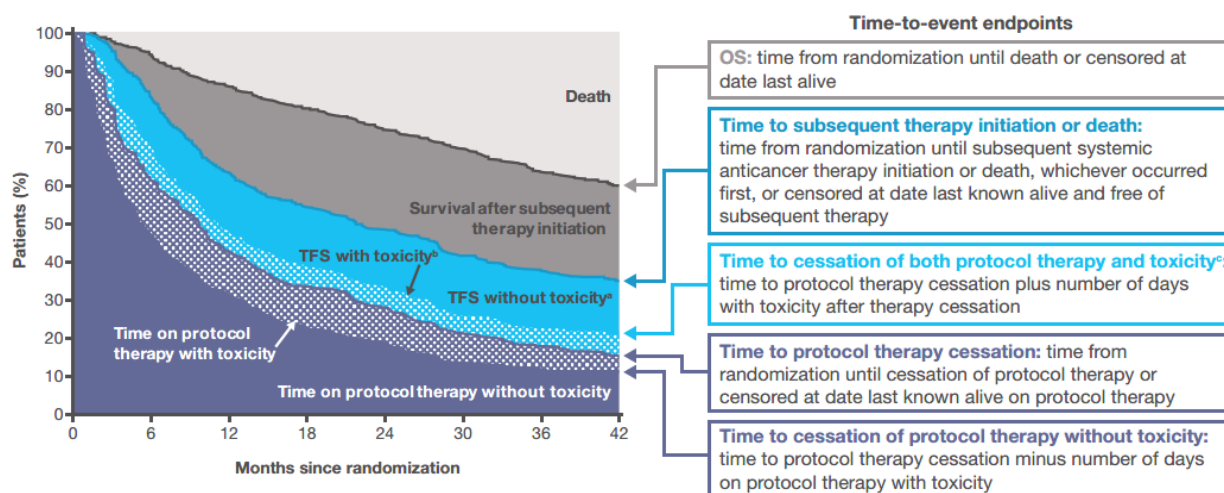

**Figure S1.**

Kaplan–Meier estimates of (A) overall survival, (B) time to subsequent systemic therapy initiation or death, and (C) time to protocol therapy cessation over the 42-month follow-up period for analysis, according to IMDC risk group. The 42-month Kaplan–Meier estimates (% event-free) and 42-month mean times are summarized below.

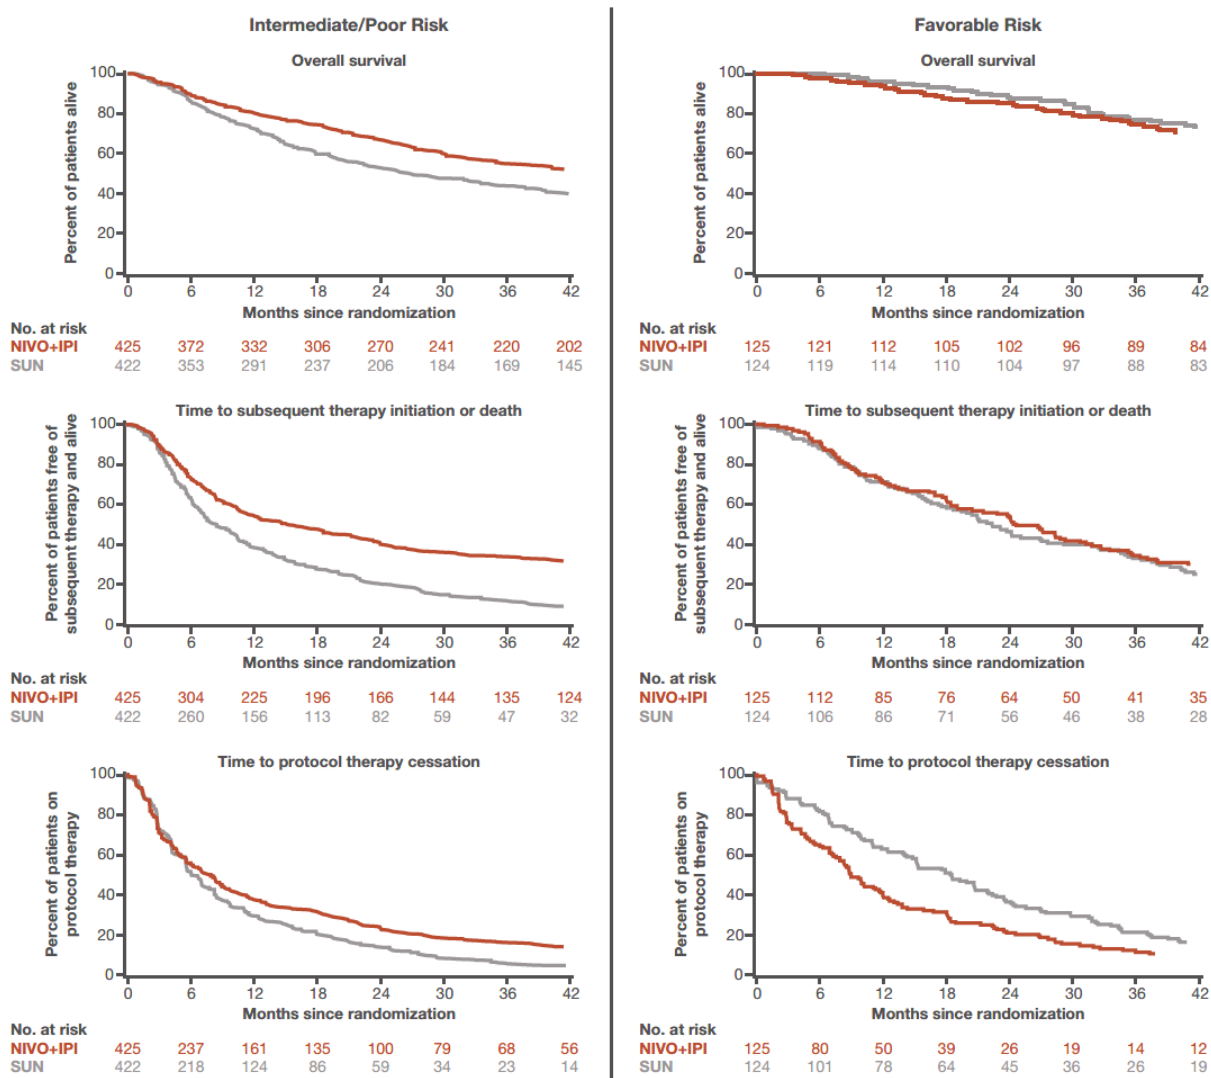

Figure S1 continued

|                                                       | Intermediate/poor risk |            | Favorable risk |            | Intent-to-treat |            |
|-------------------------------------------------------|------------------------|------------|----------------|------------|-----------------|------------|
|                                                       | NIVO+IPI               | SUN        | NIVO+IPI       | SUN        | NIVO+IPI        | SUN        |
| <b><i>N patients randomized</i></b>                   | <b>425</b>             | <b>422</b> | <b>125</b>     | <b>124</b> | <b>550</b>      | <b>546</b> |
| <b>Overall survival</b>                               |                        |            |                |            |                 |            |
| <i>N events</i>                                       | 207                    | 255        | 43             | 37         | 250             | 292        |
| KM percent event-free at 42 months                    | 52%                    | 39%        | 70.1%          | 73%        | 56%             | 47%        |
| 42-month mean time, months                            | 30.1                   | 25.9       | 36.2           | 37.5       | 31.5            | 28.6       |
| <b>Time to subsequent therapy initiation or death</b> |                        |            |                |            |                 |            |
| <i>N events</i>                                       | 289                    | 377        | 90             | 99         | 379             | 476        |
| KM percent event-free at 42 months                    | 31%                    | 9.0%       | 29%            | 24%        | 31%             | 12%        |
| 42-month mean time, months                            | 21.0                   | 13.9       | 25.0           | 23.9       | 21.9            | 16.2       |
| <b>Time to protocol therapy cessation</b>             |                        |            |                |            |                 |            |
| <i>N events</i>                                       | 373                    | 406        | 117            | 113        | 490             | 519        |
| KM percent event-free at 42 months                    | 14%                    | 4.1%       | 9.6%           | 15%        | 13%             | 6.6%       |
| 42-month mean time, months                            | 14.1                   | 10.8       | 14.0           | 20.2       | 14.1            | 12.9       |

Abbreviations: International Metastatic Renal Cell Carcinoma Database Consortium; NIVO+IPI, nivolumab plus ipilimumab; SUN, sunitinib; KM, Kaplan–Meier estimate.

Overall survival was defined from randomization until death from any cause, or was censored on the date last known alive.

Time to subsequent therapy initiation or death was defined from randomization until initiation of subsequent systemic anticancer therapy or death, whichever occurred first, or censored at the date last known alive and free of subsequent therapy.

Time to protocol therapy cessation was defined from randomization until cessation of protocol therapy, or censored at the date last known alive on protocol therapy.

**Table S1.** Kaplan–Meier estimates of 12-, 24-, 36-, and 42-month percentages of patients surviving free from subsequent therapy initiation and free from protocol therapy cessation and surviving treatment-free, according to IMDC risk group. The percentages of patients surviving treatment-free were estimated by the differences in Kaplan–Meier estimates of the two defining endpoints (3).

| Month | Kaplan–Meier estimates at<br>x months since randomization | Favorable risk  |            | Intermediate/<br>poor risk |            | Intent-to-treat |            |
|-------|-----------------------------------------------------------|-----------------|------------|----------------------------|------------|-----------------|------------|
|       |                                                           | NIVO+IPI<br>(%) | SUN<br>(%) | NIVO+IPI<br>(%)            | SUN<br>(%) | NIVO+IPI<br>(%) | SUN<br>(%) |
| 12    | Surviving free from subsequent<br>therapy initiation      | 71              | 71         | 54                         | 39         | 58              | 46         |
|       | Free from protocol therapy<br>cessation                   | 40.0            | 63         | 38                         | 29         | 38              | 37         |
|       | Surviving treatment-free                                  | 31              | 8.2        | 16                         | 9.3        | 19.6            | 9.0        |
| 24    | Surviving free from subsequent<br>therapy initiation      | 53              | 46         | 41                         | 20.3       | 44              | 26         |
|       | Free from protocol therapy<br>cessation                   | 21              | 36         | 23                         | 14         | 23              | 19         |
|       | Surviving treatment-free                                  | 32              | 10.0       | 18                         | 6.3        | 21              | 7.2        |
| 36    | Surviving free from subsequent<br>therapy initiation      | 34              | 33         | 34                         | 12         | 34              | 17         |
|       | Free from protocol therapy<br>cessation                   | 11              | 21         | 16                         | 5.6        | 15              | 9.1        |
|       | Surviving treatment-free                                  | 23              | 12         | 18                         | 6.2        | 19              | 7.5        |
| 42    | Surviving free from subsequent<br>therapy initiation      | 29              | 24         | 31                         | 9.0        | 31              | 12         |
|       | Free from protocol therapy<br>cessation                   | 9.6             | 15         | 14                         | 4.1        | 13              | 6.6        |
|       | Surviving treatment-free                                  | 19.5            | 8.8        | 18                         | 4.9        | 18              | 5.8        |

**Figure S2.**

TFS, survival after subsequent systemic therapy, and prior protocol therapy durations relative to time of protocol therapy cessation, according to IMDC risk. X-axis is truncated at 42 months before and 42 months after protocol therapy cessation.

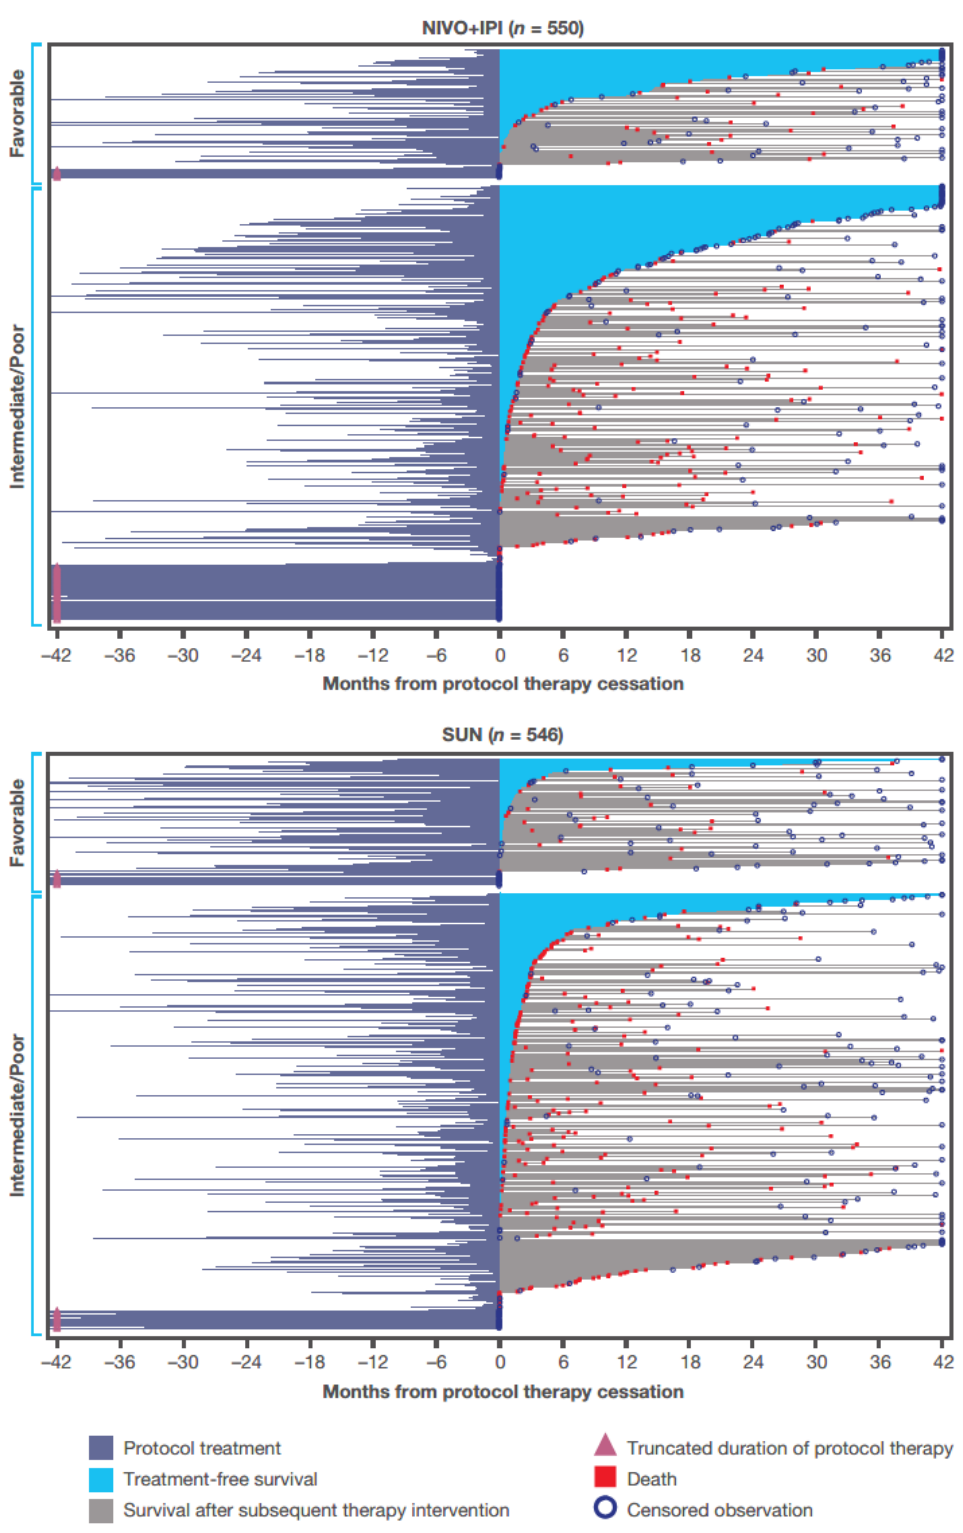

**Figure S3.**

Estimates of TFS, with and without toxicity, and other survival states over the 42-month period since randomization, according to treatment group in the overall intent-to-treat population of 1096 patients. Toxicity is defined alternatively by (A) grade  $\geq 3$  TRAEs and (B) grade  $\geq 2$  TRAEs. Abbreviation: RX, therapy.

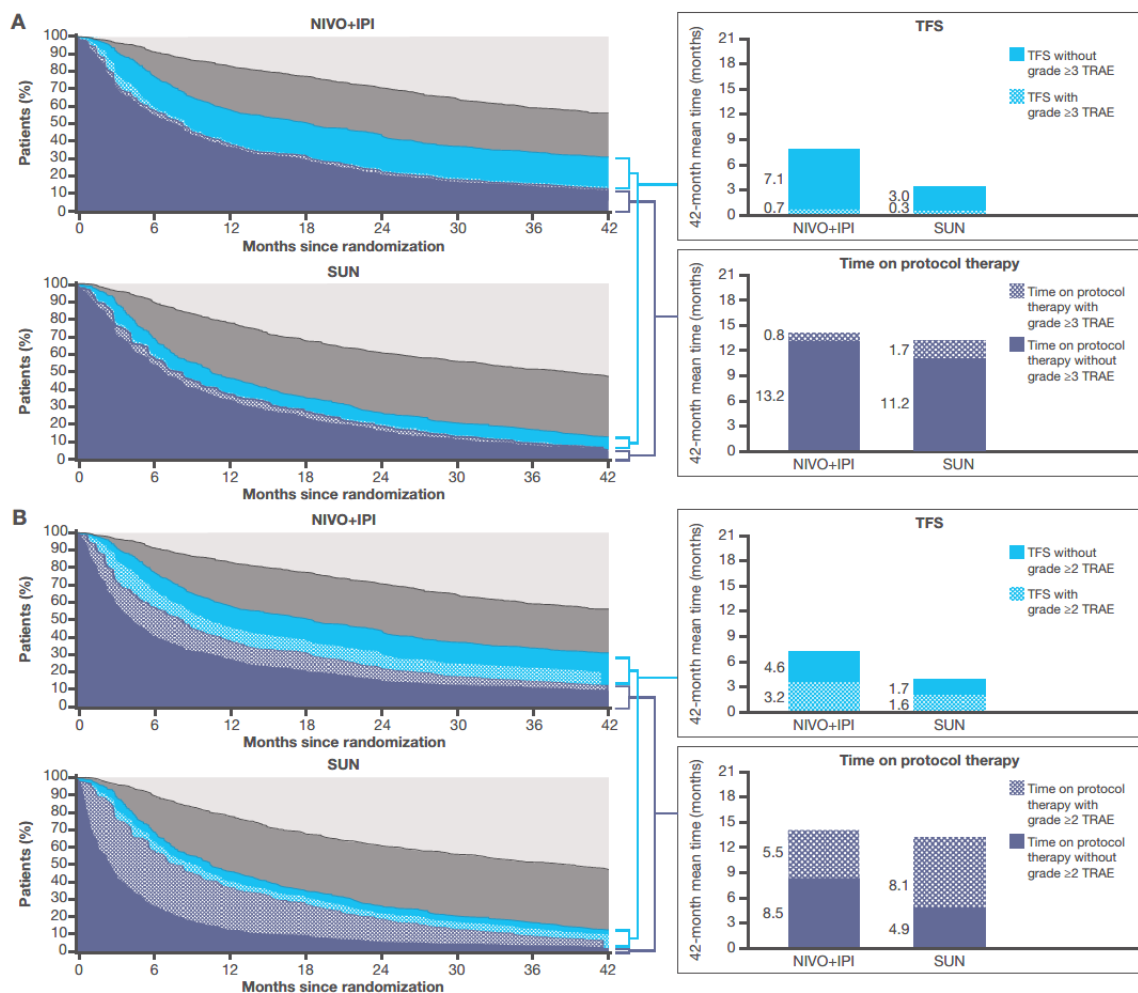

| Survival state                           | 42-month mean time, months |               | Difference (95% CI) |
|------------------------------------------|----------------------------|---------------|---------------------|
|                                          | NIVO+IPI (N = 550)         | SUN (N = 546) |                     |
| Overall survival                         | 31.5                       | 28.6          |                     |
| Survival after subsequent Rx initiation  | 9.5                        | 12.4          | -2.8 (-4.3 to -1.3) |
| TFS                                      | 7.8                        | 3.3           | 4.6 (3.4-5.7)       |
| Time on protocol Rx                      | 14.1                       | 12.9          | 1.2 (-0.4 to 2.7)   |
| <b>A. Grade <math>\geq 3</math> TRAE</b> |                            |               |                     |
| TFS without grade $\geq 3$ TRAE          | 7.1                        | 3.0           | 4.1 (3.0-5.2)       |
| TFS with grade $\geq 3$ TRAE             | 0.7                        | 0.3           | 0.4 (0.1-0.8)       |
| Protocol Rx with grade $\geq 3$ TRAE     | 0.8                        | 1.7           | -0.9 (-1.4 to -0.3) |
| Protocol Rx without grade $\geq 3$ TRAE  | 13.2                       | 11.2          | 2.1 (0.6-3.5)       |
| <b>B. Grade <math>\geq 2</math> TRAE</b> |                            |               |                     |
| TFS without grade $\geq 2$ TRAE          | 4.6                        | 1.7           | 2.9 (1.9-3.8)       |
| TFS with grade $\geq 2$ TRAE             | 3.2                        | 1.6           | 1.7 (0.9-2.4)       |
| Protocol Rx with grade $\geq 2$ TRAE     | 5.5                        | 8.1           | -2.5 (-3.8 to -1.3) |
| Protocol Rx without grade $\geq 2$ TRAE  | 8.5                        | 4.9           | 3.7 (2.6-4.7)       |

## References

1. Goldhirsch A, Gelber RD, Simes RJ, Glasziou P, Coates AS. Costs and benefits of adjuvant therapy in breast cancer: a quality-adjusted survival analysis. *J Clin Oncol* 1989;7:36-44.
2. Gelber RD, Goldhirsch A, Cole BF. Evaluation of effectiveness: Q-TWiST. The International Breast Cancer Study Group. *Cancer Treat Rev* 1993;19(suppl A):73-84.
3. Huang B, Tian L, McCaw ZR, Luo X, Talukder E, Rothenberg M, et al. Analysis of response data for assessing treatment effects in comparative clinical studies. *Ann Intern Med* 2020;173:368-74.
